# Supplementary material for: Associations of Real-Time Ultrasound and Strain and Shear Wave Elastography with Gastrointestinal Organs: A Systematic Review
Source: MDPI journal article supplement (doi:10.3390/diagnostics13213302), 2023-10-25
Supplement: s1 [file s1]

## Supplementary Table S1

---

(ultrasound elastography[MeSH Terms]) AND (colon[MeSH Terms]) ("diagnostic imaging"[MeSH Subheading] OR ("diagnostic"[All Fields] AND "imaging"[All Fields]) OR "diagnostic imaging"[All Fields] OR "ultrasound"[All Fields] OR "ultrasonography"[MeSH Terms] OR "ultrasonography"[All Fields] OR "ultrasonics"[MeSH Terms] OR "ultrasonics"[All Fields] OR "ultrasounds"[All Fields] OR "ultrasound s"[All Fields]) AND "elasticity imaging techniques"[MeSH Terms] AND "colon"[MeSH Terms]"

(ultrasound elastography[MeSH Terms]) AND (rectum[MeSH Terms]) ("diagnostic imaging"[MeSH Subheading] OR ("diagnostic"[All Fields] AND "imaging"[All Fields]) OR "diagnostic imaging"[All Fields] OR "ultrasound"[All Fields] OR "ultrasonography"[MeSH Terms] OR "ultrasonography"[All Fields] OR "ultrasonics"[MeSH Terms] OR "ultrasonics"[All Fields] OR "ultrasounds"[All Fields] OR "ultrasound s"[All Fields]) AND "elasticity imaging techniques"[MeSH Terms] AND "rectum"[MeSH Terms]"

(ultrasound elastography[MeSH Terms]) AND (pancreas[MeSH Terms]) ("diagnostic imaging"[MeSH Subheading] OR ("diagnostic"[All Fields] AND "imaging"[All Fields]) OR "diagnostic imaging"[All Fields] OR "ultrasound"[All Fields] OR "ultrasonography"[MeSH Terms] OR "ultrasonography"[All Fields] OR "ultrasonics"[MeSH Terms] OR "ultrasonics"[All Fields] OR "ultrasounds"[All Fields] OR "ultrasound s"[All Fields]) AND "elasticity imaging techniques"[MeSH Terms] AND "pancreas"[MeSH Terms]"

(ultrasound elastography[MeSH Terms]) AND (soft tissue[MeSH Terms]) ("diagnostic imaging"[MeSH Subheading] OR ("diagnostic"[All Fields] AND "imaging"[All Fields]) OR "diagnostic imaging"[All Fields] OR "ultrasound"[All Fields] OR "ultrasonography"[MeSH Terms] OR "ultrasonography"[All Fields] OR "ultrasonics"[MeSH Terms] OR "ultrasonics"[All Fields] OR "ultrasounds"[All Fields] OR "ultrasound s"[All Fields]) AND "elasticity imaging techniques"[MeSH Terms] AND ("soft"[All Fields] AND "tissues"[MeSH Terms])"

(ultrasound elastography[MeSH Terms]) AND (intestine[MeSH Terms]) ("diagnostic imaging"[MeSH Subheading] OR ("diagnostic"[All Fields] AND "imaging"[All Fields]) OR "diagnostic imaging"[All Fields] OR "ultrasound"[All Fields] OR "ultrasonography"[MeSH Terms] OR "ultrasonography"[All Fields] OR "ultrasonics"[MeSH Terms] OR "ultrasonics"[All Fields] OR "ultrasounds"[All Fields] OR "ultrasound s"[All Fields]) AND "elasticity imaging techniques"[MeSH Terms] AND "intestines"[MeSH Terms]"

---

---

(ultrasound elastography[MeSH Terms]) AND (liver[MeSH Terms]) ("diagnostic imaging"[MeSH Subheading] OR ("diagnostic"[All Fields] AND "imaging"[All Fields]) OR "diagnostic imaging"[All Fields] OR "ultrasound"[All Fields] OR "ultrasonography"[MeSH Terms] OR "ultrasonography"[All Fields] OR "ultrasonics"[MeSH Terms] OR "ultrasonics"[All Fields] OR "ultrasounds"[All Fields] OR "ultrasound s"[All Fields]) AND "elasticity imaging techniques"[MeSH Terms] AND "liver"[MeSH Terms]" "

(ultrasound elastography[MeSH Terms]) AND (stomach[MeSH Terms]) ("diagnostic imaging"[MeSH Subheading] OR ("diagnostic"[All Fields] AND "imaging"[All Fields]) OR "diagnostic imaging"[All Fields] OR "ultrasound"[All Fields] OR "ultrasonography"[MeSH Terms] OR "ultrasonography"[All Fields] OR "ultrasonics"[MeSH Terms] OR "ultrasonics"[All Fields] OR "ultrasounds"[All Fields] OR "ultrasound s"[All Fields]) AND "elasticity imaging techniques"[MeSH Terms] AND "stomach"[MeSH Terms]"

(ultrasound elastography[MeSH Terms]) AND (lymph nodes[MeSH Terms]) ("diagnostic imaging"[MeSH Subheading] OR ("diagnostic"[All Fields] AND "imaging"[All Fields]) OR "diagnostic imaging"[All Fields] OR "ultrasound"[All Fields] OR "ultrasonography"[MeSH Terms] OR "ultrasonography"[All Fields] OR "ultrasonics"[MeSH Terms] OR "ultrasonics"[All Fields] OR "ultrasounds"[All Fields] OR "ultrasound s"[All Fields]) AND "elasticity imaging techniques"[MeSH Terms] AND "lymph nodes"[MeSH Terms]"

37 (ultrasound elastography[MeSH Terms]) AND (cardiac[MeSH Terms]) ("diagnostic imaging"[MeSH Subheading] OR ("diagnostic"[All Fields] AND "imaging"[All Fields]) OR "diagnostic imaging"[All Fields] OR "ultrasound"[All Fields] OR "ultrasonography"[MeSH Terms] OR "ultrasonography"[All Fields] OR "ultrasonics"[MeSH Terms] OR "ultrasonics"[All Fields] OR "ultrasounds"[All Fields] OR "ultrasound s"[All Fields]) AND "elasticity imaging techniques"[MeSH Terms] AND "heart"[MeSH Terms]"

(ultrasound elastography[MeSH Terms]) AND (lungs[MeSH Terms]) ("diagnostic imaging"[MeSH Subheading] OR ("diagnostic"[All Fields] AND "imaging"[All Fields]) OR "diagnostic imaging"[All Fields] OR "ultrasound"[All Fields] OR "ultrasonography"[MeSH Terms] OR "ultrasonography"[All Fields] OR "ultrasonics"[MeSH Terms] OR "ultrasonics"[All Fields] OR "ultrasounds"[All Fields] OR "ultrasound s"[All Fields]) AND "elasticity imaging techniques"[MeSH Terms] AND "lung"[MeSH Terms]"

(ultrasound elastography[MeSH Terms]) AND (thyroid[MeSH Terms]) ("diagnostic imaging"[MeSH Subheading] OR ("diagnostic"[All Fields] AND "imaging"[All Fields]) OR

---

---

""diagnostic imaging""[All Fields] OR ""ultrasound""[All Fields] OR ""ultrasonography""[MeSH Terms] OR ""ultrasonography""[All Fields] OR ""ultrasonics""[MeSH Terms] OR ""ultrasonics""[All Fields] OR ""ultrasounds""[All Fields] OR ""ultrasound s""[All Fields]) AND ""elasticity imaging techniques""[MeSH Terms] AND (""thyroid gland""[MeSH Terms] OR ""thyroid usp""[MeSH Terms])"

---

**Supplementary Table S2: Risk of Bias in Studies**

| Author                | Risk of Bias  | Type of Study       |
|-----------------------|---------------|---------------------|
| Casariago et al [9]   | Low risk      | Clinical Trial      |
| Azizi et al [10]      | Some concerns | Prospective study   |
| Dighe et al [11]      | Some concerns | Prospective study   |
| Unlütürk et al [12]   | Low risk      | Prospective study   |
| Cakal et al [13]      | Some concerns | Prospective study   |
| Asteria et al [14]    | Low risk      | Prospective study   |
| Elsayed et al [15]    | Low risk      | Prospective study   |
| Cantisiani et al [16] | Low risk      | Prospective study   |
| Du et al [17]         | Low risk      | Prospective study   |
| Yoon et al [18]       | Low risk      | Prospective study   |
| Yang et al [19]       | Some concerns | Retrospective Study |
| Gay et al [20]        | Some concerns | Prospective study   |
| Russ et al [21]       | Low risk      | Prospective study   |
| Li et al [22]         | Some concerns | Prospective study   |
| Wu et al [23]         | Some concerns | Retrospective Study |
| Seong et al [24]      | Low risk      | Retrospective Study |
| Bhatia et al [25]     | Some concerns | Prospective study   |
| Huang et al [26]      | Some concerns | Prospective study   |
| Rigamonti et al [27]  | Low risk      | Prospective study   |
| Sporea et al [28]     | Low risk      | Prospective study   |
| Abrams et al [29]     | Some concerns | Prospective study   |
| Garg et al [30]       | Low risk      | Prospective study   |
| Ramirez et al [31]    | Low risk      | Prospective study   |
| Malik et al [32]      | Low risk      | Prospective study   |
| Corpechot et al [33]  | Low risk      | Prospective study   |



|                         |               |                     |
|-------------------------|---------------|---------------------|
| Miaillhes et al [34]    | Low risk      | Prospective study   |
| Lee et al [35]          | Low risk      | Prospective study   |
| Harada et al [36]       | Low risk      | Prospective study   |
| Gara et al [37]         | Low risk      | Prospective study   |
| Pang et al [38]         | Low risk      | Prospective study   |
| Dominguez et al [39]    | Low risk      | Prospective study   |
| Seo et al [40]          | Low risk      | Prospective study   |
| Xie et al [41]          | Low risk      | Prospective study   |
| Beckebaum et al [42]    | Low risk      | Prospective study   |
| Obara et al [43]        | Low risk      | Prospective study   |
| Endo et al [44]         | Some concerns | Prospective study   |
| Ooi et al [45]          | Some concerns | Prospective study   |
| Jin et al [46]          | Low risk      | Prospective study   |
| Chae et al [47]         | Low risk      | Prospective study   |
| Desmots et al [48]      | Low risk      | Prospective study   |
| Alam et al [49]         | Low risk      | Prospective study   |
| Lo et al [50]           | Some concerns | Prospective study   |
| Lenghel et al [51]      | Low risk      | Prospective study   |
| Chang et al [52]        | Low risk      | Prospective study   |
| Paterson et al [53]     | Low risk      | Retrospective Study |
| Choi et al [54]         | Low risk      | Prospective study   |
| Choi et al [55]         | Low risk      | Retrospective Study |
| Fujiwara et al [56]     | Low risk      | Clinical Trial      |
| Verhoeven et al [57]    | Low risk      | Retrospective Study |
| Ng et al [58]           | Low risk      | Prospective Study   |
| Seo et al [59]          | Low risk      | Prospective study   |
| Ogata et al [60]        | Low risk      | Retrospective Study |
| Taylor et al [61]       | Some concerns | Prospective study   |
| Acu et al [62]          | Low risk      | Prospective study   |
| Fournier et al [63]     | Some concerns | Prospective study   |
| Korrungruang et al [64] | Low risk      | Prospective study   |
| Larsen et al [65]       | Low risk      | Prospective study   |

|                         |          |                   |
|-------------------------|----------|-------------------|
| Harve et al [66]        | Low risk | Prospective study |
| Che et al [67]          | Low risk | Prospective study |
| Pehlivan et al [68]     | Low risk | Prospective study |
| Fang et al [69]         | Low risk | Prospective study |
| Sun et al [70]          | Low risk | Prospective study |
| Lin et al [71]          | Low risk | Prospective study |
| Cha et al [72]          | Low risk | Prospective study |
| Barr et al [73]         | Low risk | Prospective study |
| Li et al [74]           | Low risk | Prospective study |
| Suhara et al [75]       | Low risk | Prospective study |
| Rustemović et al [76]   | Low risk | Prospective study |
| Kataoka et al [77]      | Low risk | Prospective study |
| Carrara et al [78]      | Low risk | Prospective study |
| Ignes et al [79]        | Low risk | Prospective study |
| Okasha et al [80]       | Low risk | Prospective study |
| Ahmad et al [81]        | Low risk | Prospective study |
| Aghaghazvini et al [82] | Low risk | Prospective study |
| Wang et al [83]         | Low risk | Prospective study |
| Azizi et al [84]        | Low risk | Prospective study |
| Wang et al [85]         | Low risk | Prospective study |
| Kratky et al [86]       | Low risk | Prospective study |

**Supplementary Table S3: Type of Elastography Investigated in Studies**

| Author                | Elastography                       |
|-----------------------|------------------------------------|
| Casariego et al [9]   | Real-Time Ultrasound elastography  |
| Azizi et al [10]      | Shear wave elastography            |
| Dighe et al [11]      | Real-Time Ultrasound elastography  |
| Unlütürk et al [12]   | Real-Time Ultrasound elastography  |
| Cakal et al [13]      | Real-Time Ultrasound elastography  |
| Asteria et al [14]    | Real-Time Ultrasound elastography  |
| Elsayed et al [15]    | Real-Time Ultrasound elastography  |
| Cantisiani et al [16] | Real-Time ultrasound elastography  |
| Du et al [17]         | Real-Time ultrasound elastography  |
| Yoon et al [18]       | Real-Time Ultrasound elastography  |
| Yang et al [19]       | Strain elastography                |
| Gay et al [20]        | Strain and shear wave elastography |
| Russ et al [21]       | Real-Time Ultrasound elastography  |
| Li et al [22]         | Shear wave elastography            |
| Wu et al [23]         | Real-Time Ultrasound elastography  |
| Seong et al [24]      | Strain elastography                |
| Bhatia et al [25]     | Shear wave elastography            |
| Huang et al [26]      | Shear wave elastography            |
| Rigamonti et al [27]  | Shear wave elastography            |
| Sporea et al [28]     | Shear wave elastography            |
| Abrams et al [29]     | Shear wave elastography            |
| Garg et al [30]       | Shear wave elastography            |
| Ramirez et al [31]    | Shear wave elastography            |
| Malik et al [32]      | Shear wave elastography            |

---

|                         |                                   |
|-------------------------|-----------------------------------|
| Corpechot et al [33]    | Shear wave elastography           |
| Miaillhes et al [34]    | Shear wave elastography           |
| Lee et al [35]          | Shear wave elastography           |
| Harada et al [36]       | Shear wave elastography           |
| Gara et al [37]         | Shear wave elastography           |
| Pang et al [38]         | Shear wave elastography           |
| Dominguez et al [39]    | Shear wave elastography           |
| Seo et al [40]          | Shear wave elastography           |
| Xie et al [41]          | Shear wave elastography           |
| Beckebaum et al [42]    | Shear wave elastography           |
| Obara et al [43]        | Shear wave elastography           |
| Endo et al [44]         | Shear wave elastography           |
| Ooi et al [45]          | Real-time ultrasound elastography |
| Jin et al [46]          | Strain elastography               |
| Chae et al [47]         | Shear wave elastography           |
| Desmots et al [48]      | Shear wave elastography           |
| Alam et al [49]         | Shear wave elastography           |
| Lo et al [50]           | Shear wave elastography           |
| Lenghel et al [51]      | Shear wave elastography           |
| Chang et al [52]        | Strain elastography               |
| Paterson et al [53]     | Real-time ultrasound elastography |
| Choi et al [54]         | Strain elastography               |
| Choi et al [55]         | Shear wave elastography           |
| Fujiwara et al [56]     | Strain elastography               |
| Verhoeven et al [57]    | Strain elastography               |
| Ng et al [58]           | Shear wave elastography           |
| Seo et al [59]          | Shear wave elastography           |
| Ogata et al [60]        | Real-time elastography            |
| Taylor et al [61]       | Strain elastography               |
| Acu et al [62]          | Strain elastography               |
| Fournier et al [63]     | Strain elastography               |
| Korrungruang et al [64] | Strain elastography               |

---

---

|                         |                                   |
|-------------------------|-----------------------------------|
| Larsen et al [65]       | Real-time ultrasound elastography |
| Harve et al [66]        | Strain elastography               |
| Che et al [67]          | Shear wave elastography           |
| Pehlivan et al [68]     | Real time elastography            |
| Fang et al [69]         | Real-time ultrasound elastography |
| Sun et al [70]          | Real-time ultrasound elastography |
| Lin et al [71]          | Real-time ultrasound elastography |
| Cha et al [72]          | Shear wave elastography           |
| Barr et al [73]         | Shear wave elastography           |
| Li et al [74]           | Shear wave elastography           |
| Suhara et al [75]       | Real-time elastography            |
| Rustemović et al [76]   | Real-time elastography            |
| Kataoka et al [77]      | Real-time ultrasound elastography |
| Carrara et al [78]      | Real-time ultrasound elastography |
| Ignes et al [79]        | Real-time ultrasound elastography |
| Okasha et al [80]       | Real-time ultrasound elastography |
| Ahmad et al [81]        | Shear wave elastography           |
| Aghaghazvini et al [82] | Shear wave elastography           |
| Wang et al [83]         | Shear wave elastography           |
| Azizi et al [84]        | Real-Time elastography            |
| Wang et al [85]         | Shear wave elastography           |
| Kratky et al [86]       | Strain elastography               |

---

**Supplementary Table S4: Sources of Funding of studies discussed**

| Author                | Sources of Funding                                                                                                                       |
|-----------------------|------------------------------------------------------------------------------------------------------------------------------------------|
| Casariego et al [9]   | No sources received                                                                                                                      |
| Azizi et al [10]      | No sources declared                                                                                                                      |
| Dighe et al [11]      | No sources declared                                                                                                                      |
| Unlütürk et al [12]   | No sources received                                                                                                                      |
| Cakal et al [13]      | No sources declared                                                                                                                      |
| Asteria et al [14]    | No sources declared                                                                                                                      |
| Elsayed et al [15]    | No sources received                                                                                                                      |
| Cantisiani et al [16] | No sources received                                                                                                                      |
| Du et al [17]         | Funding received from Central Hospital of Shanghai Putuo District Yuying talent project                                                  |
| Yoon et al [18]       | No sources declared                                                                                                                      |
| Yang et al [19]       | No sources declared                                                                                                                      |
| Gay et al [20]        | No sources declared                                                                                                                      |
| Russ et al [21]       | No sources received                                                                                                                      |
| Li et al [22]         | No sources declared                                                                                                                      |
| Wu et al [23]         | Funding received from Planned Project of Jiangsu Province Health Department and Clinical Research grant of Wujieping Medical Foundation. |
| Seong et al [24]      | No sources declared                                                                                                                      |
| Bhatia et al [25]     | No sources received                                                                                                                      |
| Huang et al [26]      | No sources received                                                                                                                      |

---

|                      |                                                                                                                                     |
|----------------------|-------------------------------------------------------------------------------------------------------------------------------------|
| Rigamonti et al [27] | Funding received from Roche S.P.A., Italy and Mr Aldo Antognozzi and Consorzio Trapianti d'Organo.                                  |
| Sporea et al [28]    | No sources received                                                                                                                 |
| Abrams et al [29]    | No sources received                                                                                                                 |
| Garg et al [30]      | No sources received                                                                                                                 |
| Ramirez et al [31]   | No sources declared                                                                                                                 |
| Malik et al [32]     | No sources received                                                                                                                 |
| Corpechot et al [33] | Funding from Fonds CSP                                                                                                              |
| Miaillhes et al [34] | No sources received                                                                                                                 |
| Lee et al [35]       | Funding received from Korea Health 21 R&D project, Ministry of Health, Welfare and Family Affairs, Republic of Korea (No. A050021). |
| Harada et al [36]    | No sources received                                                                                                                 |
| Gara et al [37]      | No sources received                                                                                                                 |
| Pang et al [38]      | No sources received                                                                                                                 |
| Dominguez et al [39] | Funding received in part from Fundación de Investigación Mutua Madrileña                                                            |
| Seo et al [40]       | No sources received                                                                                                                 |
| Xie et al [41]       | Funding received from National Natural Science Foundation of China (81770607 and 81772626).                                         |
| Beckebaum et al [42] | No sources received                                                                                                                 |
| Obara et al [43]     | No sources received                                                                                                                 |
| Endo et al [44]      | No sources received                                                                                                                 |
| Ooi et al [45]       | No sources received                                                                                                                 |
| Jin et al [46]       | No sources received                                                                                                                 |
| Chae et al [47]      | No sources received                                                                                                                 |
| Desmots et al [48]   | No sources received                                                                                                                 |
| Alam et al [49]      | No sources received                                                                                                                 |

---

|                         |                                                                                                                                                                                        |
|-------------------------|----------------------------------------------------------------------------------------------------------------------------------------------------------------------------------------|
| Lo et al [50]           | No sources received                                                                                                                                                                    |
| Lenghel et al [51]      | No sources received                                                                                                                                                                    |
| Chang et al [52]        | Funding received from National Natural Science Foundation of China (grants 81470079 and 81172078) and the Key Project of the Shanghai Municipal Health Bureau (grant 201440038).       |
| Paterson et al [53]     | No sources received                                                                                                                                                                    |
| Choi et al [54]         | No sources received                                                                                                                                                                    |
| Choi et al [55]         | No sources received                                                                                                                                                                    |
| Fujiwara et al [56]     | Honoraria and lecture fees from Olympus Medical Systems for EBUS-TBNA training courses                                                                                                 |
| Verhoeven et al [57]    | No sources received                                                                                                                                                                    |
| Ng et al [58]           | Funding received from University of Malaya Faculty Research Grant (RU Grant-Faculty Programme (Project No: GPF06C-2018), Fundamental Research Grant Scheme (FRGS/1/2019/SKK03/UM/01/1) |
| Seo et al [59]          | No sources received                                                                                                                                                                    |
| Ogata et al [60]        | No sources received                                                                                                                                                                    |
| Taylor et al [61]       | No sources received                                                                                                                                                                    |
| Acu et al [62]          | No sources received                                                                                                                                                                    |
| Fournier et al [63]     | No sources received                                                                                                                                                                    |
| Korrungruang et al [64] | No sources received                                                                                                                                                                    |
| Larsen et al [65]       | No sources received                                                                                                                                                                    |
| Harve et al [66]        | No sources received                                                                                                                                                                    |
| Che et al [67]          | No sources received                                                                                                                                                                    |
| Pehlivan et al [68]     | No sources received                                                                                                                                                                    |
| Fang et al [69]         | No sources received                                                                                                                                                                    |
| Sun et al [70]          | No sources received                                                                                                                                                                    |
| Lin et al [71]          | No sources received                                                                                                                                                                    |



---

|                         |                     |
|-------------------------|---------------------|
| Cha et al [72]          | No sources received |
| Barr et al [73]         | No sources received |
| Li et al [74]           | No sources received |
| Suhara et al [75]       | No sources received |
| Rustemović et al [76]   | No sources received |
| Kataoka et al [77]      | No sources received |
| Carrara et al [78]      | No sources received |
| Ignes et al [79]        | No sources received |
| Okasha et al [80]       | No sources received |
| Ahmad et al [81]        | No sources received |
| Aghaghazvini et al [82] | No sources received |
| Wang et al [83]         | No sources received |
| Azizi et al [84]        | No sources received |
| Wang et al [85]         | No sources received |
| Kratky et al [86]       | No sources received |

---

**Supplementary Table S5: PRISMA Checklist**

| Section and Topic    | Item # | Checklist item                                                                                                                                                                                                                                                                   | Location where item is reported                                   |
|----------------------|--------|----------------------------------------------------------------------------------------------------------------------------------------------------------------------------------------------------------------------------------------------------------------------------------|-------------------------------------------------------------------|
| <b>TITLE</b>         |        |                                                                                                                                                                                                                                                                                  |                                                                   |
| Title                | 1      | Identify the report as a systematic review.                                                                                                                                                                                                                                      | Title                                                             |
| <b>ABSTRACT</b>      |        |                                                                                                                                                                                                                                                                                  |                                                                   |
| Abstract             | 2      | See the PRISMA 2020 for Abstracts checklist.                                                                                                                                                                                                                                     | Lines 16 to 34                                                    |
| <b>INTRODUCTION</b>  |        |                                                                                                                                                                                                                                                                                  |                                                                   |
| Rationale            | 3      | Describe the rationale for the review in the context of existing knowledge.                                                                                                                                                                                                      | Lines 37 to 76                                                    |
| Objectives           | 4      | Provide an explicit statement of the objective(s) or question(s) the review addresses.                                                                                                                                                                                           | Lines 76 to 80                                                    |
| <b>METHODS</b>       |        |                                                                                                                                                                                                                                                                                  |                                                                   |
| Eligibility criteria | 5      | Specify the inclusion and exclusion criteria for the review and how studies were grouped for the syntheses.                                                                                                                                                                      | Lines 85 to 96, Lines 89 to 90, Lines 95 to 104, Lines 113 to 116 |
| Information sources  | 6      | Specify all databases, registers, websites, organisations, reference lists and other sources searched or consulted to identify studies. Specify the date when each source was last searched or consulted.                                                                        | Lines 89 to 90, supplementary table 1                             |
| Search strategy      | 7      | Present the full search strategies for all databases, registers and websites, including any filters and limits used.                                                                                                                                                             | Lines 89 to 90, supplementary table 1                             |
| Selection process    | 8      | Specify the methods used to decide whether a study met the inclusion criteria of the review, including how many reviewers screened each record and each report retrieved, whether they worked independently, and if applicable, details of automation tools used in the process. | Lines 91 to 95, lines 105 to 106                                  |
| Data collection      | 9      | Specify the methods used to collect data from reports, including how many reviewers collected data from each                                                                                                                                                                     | Lines 104 to 109                                                  |

| Section and Topic             | Item # | Checklist item                                                                                                                                                                                                                                                                | Location where item is reported         |
|-------------------------------|--------|-------------------------------------------------------------------------------------------------------------------------------------------------------------------------------------------------------------------------------------------------------------------------------|-----------------------------------------|
| process                       |        | report, whether they worked independently, any processes for obtaining or confirming data from study investigators, and if applicable, details of automation tools used in the process.                                                                                       |                                         |
| Data items                    | 10a    | List and define all outcomes for which data were sought. Specify whether all results that were compatible with each outcome domain in each study were sought (e.g. for all measures, time points, analyses), and if not, the methods used to decide which results to collect. | Lines 104 to 109, Supplementary Table 3 |
|                               | 10b    | List and define all other variables for which data were sought (e.g. participant and intervention characteristics, funding sources). Describe any assumptions made about any missing or unclear information.                                                                  | Lines 110 to 112                        |
| Study risk of bias assessment | 11     | Specify the methods used to assess risk of bias in the included studies, including details of the tool(s) used, how many reviewers assessed each study and whether they worked independently, and if applicable, details of automation tools used in the process.             | Lines 112                               |
| Effect measures               | 12     | Specify for each outcome the effect measure(s) (e.g. risk ratio, mean difference) used in the synthesis or presentation of results.                                                                                                                                           | Lines 126 to 130                        |
| Synthesis methods             | 13a    | Describe the processes used to decide which studies were eligible for each synthesis (e.g. tabulating the study intervention characteristics and comparing against the planned groups for each synthesis (item #5)).                                                          | Lines 116 to 118                        |
|                               | 13b    | Describe any methods required to prepare the data for presentation or synthesis, such as handling of missing summary statistics, or data conversions.                                                                                                                         | Lines 125 to 130                        |
|                               | 13c    | Describe any methods used to tabulate or visually display results of individual studies and syntheses.                                                                                                                                                                        | Table 2                                 |
|                               | 13d    | Describe any methods used to synthesize results and provide a rationale for the choice(s). If meta-analysis was performed, describe the model(s), method(s) to identify the presence and extent of statistical heterogeneity, and software package(s) used.                   | Lines 125 to 130                        |
|                               | 13e    | Describe any methods used to explore possible causes of heterogeneity among study results (e.g. subgroup analysis, meta-regression).                                                                                                                                          | N/A                                     |
|                               | 13f    | Describe any sensitivity analyses conducted to assess robustness of the synthesized results.                                                                                                                                                                                  | N/A                                     |
| Reporting bias assessment     | 14     | Describe any methods used to assess risk of bias due to missing results in a synthesis (arising from reporting biases).                                                                                                                                                       | N/A                                     |
| Certainty assessment          | 15     | Describe any methods used to assess certainty (or confidence) in the body of evidence for an outcome.                                                                                                                                                                         | N/A                                     |
| <b>RESULTS</b>                |        |                                                                                                                                                                                                                                                                               |                                         |
| Study selection               | 16a    | Describe the results of the search and selection process, from the number of records identified in the search to the number of studies included in the review, ideally using a flow diagram.                                                                                  | Figure 1                                |
|                               | 16b    | Cite studies that might appear to meet the inclusion criteria, but which were excluded, and explain why they were excluded.                                                                                                                                                   | Figure 1                                |
| Study characteristics         | 17     | Cite each included study and present its characteristics.                                                                                                                                                                                                                     | Table 2                                 |

| Section and Topic                              | Item # | Checklist item                                                                                                                                                                                                                                                                       | Location where item is reported                  |
|------------------------------------------------|--------|--------------------------------------------------------------------------------------------------------------------------------------------------------------------------------------------------------------------------------------------------------------------------------------|--------------------------------------------------|
| Risk of bias in studies                        | 18     | Present assessments of risk of bias for each included study.                                                                                                                                                                                                                         | Supplementary Table 2                            |
| Results of individual studies                  | 19     | For all outcomes, present, for each study: (a) summary statistics for each group (where appropriate) and (b) an effect estimate and its precision (e.g. confidence/credible interval), ideally using structured tables or plots.                                                     | Table 5 and 6                                    |
| Results of syntheses                           | 20a    | For each synthesis, briefly summarise the characteristics and risk of bias among contributing studies.                                                                                                                                                                               | N/A                                              |
|                                                | 20b    | Present results of all statistical syntheses conducted. If meta-analysis was done, present for each the summary estimate and its precision (e.g. confidence/credible interval) and measures of statistical heterogeneity. If comparing groups, describe the direction of the effect. | Tables 2-6                                       |
|                                                | 20c    | Present results of all investigations of possible causes of heterogeneity among study results.                                                                                                                                                                                       | N/A                                              |
|                                                | 20d    | Present results of all sensitivity analyses conducted to assess the robustness of the synthesized results.                                                                                                                                                                           | Table 5 and 6                                    |
| Reporting biases                               | 21     | Present assessments of risk of bias due to missing results (arising from reporting biases) for each synthesis assessed.                                                                                                                                                              | N/A                                              |
| Certainty of evidence                          | 22     | Present assessments of certainty (or confidence) in the body of evidence for each outcome assessed.                                                                                                                                                                                  | N/A                                              |
| <b>DISCUSSION</b>                              |        |                                                                                                                                                                                                                                                                                      |                                                  |
| Discussion                                     | 23a    | Provide a general interpretation of the results in the context of other evidence.                                                                                                                                                                                                    | Lines 190 to 269                                 |
|                                                | 23b    | Discuss any limitations of the evidence included in the review.                                                                                                                                                                                                                      | Line 273                                         |
|                                                | 23c    | Discuss any limitations of the review processes used.                                                                                                                                                                                                                                | Lines 273 to 275                                 |
|                                                | 23d    | Discuss implications of the results for practice, policy, and future research.                                                                                                                                                                                                       | Lines 276 to 295                                 |
| <b>OTHER INFORMATION</b>                       |        |                                                                                                                                                                                                                                                                                      |                                                  |
| Registration and protocol                      | 24a    | Provide registration information for the review, including register name and registration number, or state that the review was not registered.                                                                                                                                       | N/A; as this was a review, it was not registered |
|                                                | 24b    | Indicate where the review protocol can be accessed, or state that a protocol was not prepared.                                                                                                                                                                                       | N/A                                              |
|                                                | 24c    | Describe and explain any amendments to information provided at registration or in the protocol.                                                                                                                                                                                      | N/A                                              |
| Support                                        | 25     | Describe sources of financial or non-financial support for the review, and the role of the funders or sponsors in the review.                                                                                                                                                        | Line 304                                         |
| Competing interests                            | 26     | Declare any competing interests of review authors.                                                                                                                                                                                                                                   | Line 310                                         |
| Availability of data, code and other materials | 27     | Report which of the following are publicly available and where they can be found: template data collection forms; data extracted from included studies; data used for all analyses; analytic code; any other materials used in the review.                                           | Lines 307 to 308                                 |
